# Supplementary material for: Assessing the content validity of the Manchester–Oxford Foot Questionnaire in surgically treated ankle fracture patients: a qualitative study
Source: Springer Nature journal article supplement (doi:10.1186/s13018-023-04418-9), 2023-12-08

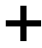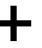

# Manchester-Oxford Foot Questionnaire (MOxFQ)

Norsk versjon (Bokmål) for Norge

Fyll ut følgende før du fyller ut spørreskjemaet:

**Dagens dato:**

|   |   |   |   |   |   |
|---|---|---|---|---|---|
|   |   |   |   |   |   |
| D | D | M | M | Å | Å |

På hvilken side av kroppen har du det leddet som du **får eller har fått behandling for**:

Venstre

Høyre

Begge

**Hvis du svarer "begge", fyller du ut det første skjemaet med tanke på høyre side.** Deretter følger et nytt spørreskjema for venstre side.

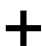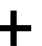

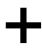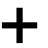

**Sett ring rundt riktig side Høyre / Venstre**

Sett et kryss  
(✓) for hvert utsagn

**1. I løpet av de 4 siste ukene har jeg opplevd følgende:**

Jeg har smerter i foten/ ankelen min.

|                          |                          |                          |                          |                          |
|--------------------------|--------------------------|--------------------------|--------------------------|--------------------------|
| Aldri                    | Sjelden                  | Noen ganger              | Det meste av tiden       | Hele tiden               |
| <input type="checkbox"/> | <input type="checkbox"/> | <input type="checkbox"/> | <input type="checkbox"/> | <input type="checkbox"/> |

**2. I løpet av de 4 siste ukene har jeg opplevd følgende:**

Jeg unngår å gå lange distanser på grunn av smerter i foten/ankelen

|                          |                          |                          |                          |                          |
|--------------------------|--------------------------|--------------------------|--------------------------|--------------------------|
| Aldri                    | Sjelden                  | Noen ganger              | Det meste av tiden       | Hele tiden               |
| <input type="checkbox"/> | <input type="checkbox"/> | <input type="checkbox"/> | <input type="checkbox"/> | <input type="checkbox"/> |

**3. I løpet av de 4 siste ukene har jeg opplevd følgende:**

Jeg endrer måten å gå på, på grunn av smerter i foten/ ankelen

|                          |                          |                          |                          |                          |
|--------------------------|--------------------------|--------------------------|--------------------------|--------------------------|
| Aldri                    | Sjelden                  | Noen ganger              | Det meste av tiden       | Hele tiden               |
| <input type="checkbox"/> | <input type="checkbox"/> | <input type="checkbox"/> | <input type="checkbox"/> | <input type="checkbox"/> |

**4. I løpet av de 4 siste ukene har jeg opplevd følgende:**

Jeg går sakte på grunn av smerter i foten/ ankelen

|                          |                          |                          |                          |                          |
|--------------------------|--------------------------|--------------------------|--------------------------|--------------------------|
| Aldri                    | Sjelden                  | Noen ganger              | Det meste av tiden       | Hele tiden               |
| <input type="checkbox"/> | <input type="checkbox"/> | <input type="checkbox"/> | <input type="checkbox"/> | <input type="checkbox"/> |

**5. I løpet av de 4 siste ukene har jeg opplevd følgende:**

Jeg må stoppe og hvile foten/ankelen på grunn av smerter

|                          |                          |                          |                          |                          |
|--------------------------|--------------------------|--------------------------|--------------------------|--------------------------|
| Aldri                    | Sjelden                  | Noen ganger              | Det meste av tiden       | Hele tiden               |
| <input type="checkbox"/> | <input type="checkbox"/> | <input type="checkbox"/> | <input type="checkbox"/> | <input type="checkbox"/> |

**6. I løpet av de 4 siste ukene har jeg opplevd følgende:**

Jeg unngår enkelte harde og ujevne underlag på grunn av smerter i foten/ankelen

|                          |                          |                          |                          |                          |
|--------------------------|--------------------------|--------------------------|--------------------------|--------------------------|
| Aldri                    | Sjelden                  | Noen ganger              | Det meste av tiden       | Hele tiden               |
| <input type="checkbox"/> | <input type="checkbox"/> | <input type="checkbox"/> | <input type="checkbox"/> | <input type="checkbox"/> |

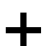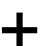

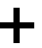

**7.** I løpet av de 4 siste ukene har jeg opplevd følgende:

Jeg unngår å stå lenge på grunn av smerter i foten/ankelen

Aldri

Sjelden

Noen ganger

Det meste av tiden

Hele tiden

**8.** I løpet av de 4 siste ukene har jeg opplevd følgende:

Jeg bruker buss eller bil i stedet for å gå på grunn av smerter i foten/ankelen

Aldri

Sjelden

Noen ganger

Det meste av tiden

Hele tiden

**9.** I løpet av de 4 siste ukene har jeg opplevd følgende:

Jeg bekymrer meg for hva andre tenker om min fot/ankel.

Aldri

Sjelden

Noen ganger

Det meste av tiden

Hele tiden

**10.** I løpet av de 4 siste ukene har jeg opplevd følgende:

Jeg bekymrer meg for hva andre tenker om fottøyet jeg er nødt til å bruke.

Aldri

Sjelden

Noen ganger

Det meste av tiden

Hele tiden

**11.** I løpet av de 4 siste ukene har jeg opplevd følgende:

Smerten i foten/ankelen min er verre om kvelden

Aldri

Sjelden

Noen ganger

Det meste av tiden

Hele tiden

**12.** I løpet av de 4 siste ukene har jeg opplevd følgende:

Jeg får lynende smerter i foten/ ankelen min

Aldri

Sjelden

Noen ganger

Det meste av tiden

Hele tiden

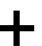



**13. I løpet av de 4 siste ukene har jeg opplevd følgende:**

Smertene i foten/ ankelen min forhindrer meg fra å utføre jobben min/  
daglige gjøremål

|                          |                          |                          |                          |                          |
|--------------------------|--------------------------|--------------------------|--------------------------|--------------------------|
| Aldri                    | Sjelden                  | Noen ganger              | Det meste av tiden       | Hele tiden               |
| <input type="checkbox"/> | <input type="checkbox"/> | <input type="checkbox"/> | <input type="checkbox"/> | <input type="checkbox"/> |

**14. I løpet av de 4 siste ukene har jeg opplevd følgende:**

Jeg er ikke i stand til å gjennomføre alle mine sosiale aktiviteter eller  
fritidsaktiviteter på grunn av smerter i foten/ankelen min.

|                          |                          |                          |                          |                          |
|--------------------------|--------------------------|--------------------------|--------------------------|--------------------------|
| Aldri                    | Sjelden                  | Noen ganger              | Det meste av tiden       | Hele tiden               |
| <input type="checkbox"/> | <input type="checkbox"/> | <input type="checkbox"/> | <input type="checkbox"/> | <input type="checkbox"/> |

**15. I løpet av de 4 siste ukene..**

Hvordan vil du beskrive smerten du vanligvis kjenner i foten/ ankelen?

|                          |                          |                          |                          |                          |
|--------------------------|--------------------------|--------------------------|--------------------------|--------------------------|
| Ingen                    | Svært mild               | Mild                     | Moderat                  | Sterk                    |
| <input type="checkbox"/> | <input type="checkbox"/> | <input type="checkbox"/> | <input type="checkbox"/> | <input type="checkbox"/> |

**16. I løpet av de 4 siste ukene..**

Har du blitt forstyrret av smerte fra foten/ ankelen etter at du har lagt  
deg om kvelden?

|                          |                          |                          |                          |                          |
|--------------------------|--------------------------|--------------------------|--------------------------|--------------------------|
| Ingen netter             | Bare 1 eller 2 netter    | Noen netter              | De fleste nettene        | Hver natt                |
| <input type="checkbox"/> | <input type="checkbox"/> | <input type="checkbox"/> | <input type="checkbox"/> | <input type="checkbox"/> |

**Til slutt, sjekk at du har svart på alle spørsmålene.  
Tusen takk!**

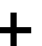

Supplement: MOESM1 [file 26508022]
