# Supplementary material for: Assessing the content validity of the Manchester–Oxford Foot Questionnaire in surgically treated ankle fracture patients: a qualitative study
Source: Springer Nature journal article supplement (doi:10.1186/s13018-023-04418-9), 2023-12-08
Supplement: MOESM2 [file 26508022]

**Additional file 2** The American Society of Anesthesiologists physical status classification system

---

| <b>Classification</b> | <b>Definition</b>                                                               |
|-----------------------|---------------------------------------------------------------------------------|
| 1                     | A normal healthy patient                                                        |
| 2                     | A patient with mild systemic disease                                            |
| 3                     | A patient with severe disease                                                   |
| 4                     | A patient with severe systematic disease that is a constant threat to life      |
| 5                     | A moribund patient who is not expected to survive without the operation         |
| 6                     | A declared brain-dead patient whose organs are being removed for donor purposes |

---
