# Supplementary material for: Assessing the content validity of the Manchester–Oxford Foot Questionnaire in surgically treated ankle fracture patients: a qualitative study
Source: Springer Nature journal article supplement (doi:10.1186/s13018-023-04418-9), 2023-12-08
Supplement: MOESM4 [file 26508022]

**Additional file 3** Quotations for the supporting evidence of relevance for the items in the MOXFQ-pain domain

---

**Early-phase recovery**

Item Quotations

- 1 *"Yes, I've experienced that sometimes. However, mild and brief." (r13)*
- 11 *"And the swelling and pain can often be a bit worse at night than during the day. But that probably depends on if you have used it the entire day." (r11)*
- 12 *"... those times that I've had it was when I stumbled and had to catch myself with the foot, slippery floors and stuff ..." (r13)*
- 15 *"The few times that I have it, it is very mild" (r14)*
- 16 *"In the beginning I could barely sleep, or I fell asleep very late. Slept pretty badly." (r11)*

**Middle-phase recovery**

Item Quotations

- 1 *"... Like, I feel pain, but I still don't sit down ... (r17)*
- 11 *"My foot is worse in the evening, depending on what I've done during the day. Like yesterday, two hours of padel [a racket sport that combines tennis and squash], then I had to limp to the bathroom later" (r7).*
- 12 *"It is painful now. Those pains [lightning pain]. I did not notice it much the first half a year. But now that is bothering me." (r17)*
- 15 *"... that they are mild, the other pain, like an aching-pain sort of..." (r17)*
- 16 *"Sometimes when I've gone to bed ... Sometimes I wonder if it is the screws that ... When I'm laying sideways, that the screws somehow ... That I feel them" (r9).*

**Late-phase recovery**

Item Quotations

- 1 *"... When I sit with my foot like this, and then push down a little bit, then I can feel it." (r5)*
  - 11 *"... you felt it the first week after surgery. And of course ... Now, you don't have ..." (r1)*
  - 12 *"... but I have not had those lightning pains ... But I have felt sometimes, when I have been at the physiotherapist, that he probably touched something ..." (r2)*
  - 15 *"Well, I think it was ... it was relevant ..." (r5)*
  - 16 *"That it gets swollen and ... or feel that I am swollen. It gets tight, is probably the correct word. It sort of tightens around [the ankle], but it is not painful" (r2)*
-
