# Supplementary material for: Assessing the content validity of the Manchester–Oxford Foot Questionnaire in surgically treated ankle fracture patients: a qualitative study
Source: Springer Nature journal article supplement (doi:10.1186/s13018-023-04418-9), 2023-12-08
Supplement: MOESM5 [file 26508022]

**Additional file 5** Quotations for the supporting evidence of relevance for the items in the MOXFQ-social interaction domain

---

**Early-phase recovery**

Item Quotations

- 9 *"... Lately, the weather has been nice, and you've been using summer shoes and summer clothes ... when you're working as a teacher, and I'm on a primary and lower secondary school, then sometimes I've been thinking: "poor kids if they [laughs] ... have to look at this half-swollen foot after a day with a lot of walking and stuff", but ..."* (r13)
- 10 -
- 13 *"... that it prevents me from carrying out my work or everyday activities, and I have responded "some of the time". Because it is not as easy as it used to be."* (r11)
- 14 *"... past five weeks we haven't spent time together close to what we used to. We often meet at the squash court or go fishing ... "* (r11)

**Middle-phase recovery**

Item Quotations

- 9 -
- 10 *"It's relevant because many times I've thought of how exhausting it can be to not be able to wear nice shoes or something like that. But I'm not bothered by it."* (r6)
- 13 *"You could say that once I started walking, then ... to put weight on my hip, then I had pain, so then I was very happy to get ready meals and stuff."* (r6)
- 14 *"I wish that I could have done a little more, and not been afraid. And that I could have gone dancing without thinking that now I will twist my ankle."* (r17)

**Late-phase recovery**

Item Quotations

- 9 -
- 10 *"This [question] I have given more thought. When you arrive with a nice dress and then ... sneakers ... "* (r5)
- 13 *"... there are things in the garden that I haven't managed to do because ... it hurts when I'm on my knees ... because I get that bend in my foot..."* (r5)
- 14 *"Of course, when you have grandchildren, so that [question] was appropriate. And I do feel a little bit restricted when playing football."* (r1)
-
