# Supplementary material for: Assessing the content validity of the Manchester–Oxford Foot Questionnaire in surgically treated ankle fracture patients: a qualitative study
Source: Springer Nature journal article supplement (doi:10.1186/s13018-023-04418-9), 2023-12-08
Supplement: MOESM6 [file 26508022]

**Additional file 4** Quotations for the supporting evidence of relevance for the items in the MOXFQ-walking/standing domain

---

**Early-phase recovery**

Item Quotations

- 2 "... because it could be that I have twisted it a little bit that I avoid walking..." (r14)
- 3 "It was very true, for a long time. I was limping." (r10)
- 4 "The pace is limited with crutches." (r13)
- 5 "It was that that it was like that for a long time ... Sit down a little bit and ... Yes." (r10)
- 6 "I think it is relevant to ask about and I have responded "most of the time" because I am always aware of the surface..." (r14)
- 7 "... it became painful in the hip of the healthy foot, because it carries much so much of the weight..." (r13)
- 8 "Yes, the first week took ... Then it was ... Yes, it is relevant." (r10)

**Middle-phase recovery**

Item Quotations

- 2 "I've walked downtown to [city], and then walked around there for a bit. Of course, you would always feel some discomfort, but not like it's the end of the world!" (r16)
- 3 "For me, it started to be a bit like Charlie Chaplin." (r15)
- 4 "Like my husband, he would probably want to walk faster, however, I ... I try to keep up with him, but sometimes I need to ask him to show me some consideration." (r17)
- 5 "Sometimes I need to stop, rest my foot and stretch the ankle. Like I've said, I feel that I need to soften it up. And then it gets a bit easier to continue walking." (r8)
- 6 "I try to avoid uneven surfaces. Not uphill or straight ... If there are grass banks or rough surfaces, like ditches in the terrain, then I will avoid it." (r8)
- 7 "Standing for a long time, that is not pleasant." (r15)
- 8 "I refuse to walk to the store. I rather use an electric scooter." (r7)

**Late-phase recovery**

Item Quotations

- 2 "If I am going to walk longer distances, then I need a size bigger [shoe size], that will fit the foot that is [laughs] ..." (r1)
  - 3 "I used to [change the way of walking], but I do not do it now." (r3)
  - 4 "I walked slowly, really... or slowly ... the first half a year." (r1)
  - 5 "Yes, I am thinking that even though I rarely do it ... stop and rest ... I have not done it much, but ... but it is still relevant." (r5)
  - 6 "... because if I come down from a rough path, then I have problems sometimes. (r1)
  - 7 "When I think about it ... then I know it's not pleasant to stand for a long time. But I have just ... I've avoided it, right?" (r5)
  - 8 "Yes, I have answered rarely there. That is because I take the car to work anyways, right? I don't feel that I ... that it is INSTEAD of walking ... But of course, if I had ... had the habit of walking to work or something like that, then I would probably take the car a little bit more during that time, right?" (r5)
-
